# Supplementary material for: Nkx2.9 Contributes to Mid-Hindbrain Patterning by Regulation of mdDA Neuronal Cell-Fate and Repression of a Hindbrain-Specific Cell-Fate
Source: MDPI journal article supplement (doi:10.3390/ijms222312663), 2021-11-23
Supplement: s1 [file s1]

| Gene name     | Log2(FC)             | Wald-stat p-value   |
|---------------|----------------------|---------------------|
| Pcsk1n        | 0,4146166526         | 0,000048003         |
| Gm7536        | 0,4054588154         | 0,0005670297        |
| <b>En1</b>    | <b>0,3996925462</b>  | <b>0,0005576358</b> |
| Rnu1a1        | 0,3633070995         | 0,0028868715        |
| Mt3           | 0,3550846834         | 0,0032496994        |
| <b>Pax7</b>   | <b>0,3500817405</b>  | <b>0,0034758224</b> |
| Ndufa11       | 0,3481034644         | 0,0043853233        |
| Gm15427       | 0,3383818254         | 0,0050271379        |
| Ttc9b         | 0,3335230703         | 0,005896077         |
| Snora78       | 0,3263346364         | 0,0073576189        |
| <b>En2</b>    | <b>0,3180848674</b>  | <b>0,0031561926</b> |
| Evx1os        | 0,3171962712         | 0,0002457122        |
| Vstm2l        | 0,3136170096         | 0,0044174195        |
| Map3k10       | 0,2987768445         | 0,0038369143        |
| Nomo1         | 0,296619302          | 0,0071867956        |
| Evx2          | 0,2857290737         | 0,0082611348        |
| Gm22748       | 0,2850035298         | 0,0041804413        |
| Clta          | 0,2739191983         | 0,0099375215        |
| <b>Tph2</b>   | <b>0,2731224029</b>  | <b>0,0024837363</b> |
| Gm23287       | 0,2530810829         | 0,001374245         |
| Reg3g         | 0,2523846645         | 0,0099252489        |
| Arid1b        | 0,2148935625         | 0,0078226139        |
| Fscn1         | 0,2061316688         | 0,0087255421        |
| Skor1         | 0,170660843          | 0,003380201         |
| <b>Wnt8b</b>  | <b>-0,2062715433</b> | <b>0,0087604517</b> |
| Plxna4os2     | -0,2324920865        | 0,009206205         |
| Npepps        | -0,243807535         | 0,0077846188        |
| Fbxo18        | -0,244507896         | 0,0089366575        |
| Srrm2         | -0,2534967529        | 0,0009093718        |
| Nup205        | -0,2554291291        | 0,0044950192        |
| Zkscan3       | -0,2830899347        | 0,0100248199        |
| Dock7         | -0,2946875078        | 0,000215144         |
| Hbb-y         | -0,3001813086        | 0,0089660215        |
| Gm9531        | -0,3061272885        | 0,0095711757        |
| Opc           | -0,3094303304        | 0,0014856541        |
| Snx32         | -0,3219456583        | 0,0048618493        |
| Kdm6a         | -0,3269529612        | 0,0014868219        |
| 1700048O20Rik | -0,3439046943        | 0,0030767538        |
| Clint1        | -0,3485911948        | 0,0024351027        |
